# Supplementary material for: Solution mediated halide exchange engineering for the fabrication of a thick CsPbCl3 film and its application in photovoltaics with outstanding performance
Source: Royal Society of Chemistry journal article supplement (doi:10.1039/d4dt02224f), 2024-01-01
Supplement: d4dt02224f1.pdf [file d4dt02224f1.pdf]

## Supporting Information

# A solution mediated halide exchange engineering for fabrication of thick CsPbCl<sub>3</sub> film and its application in photovoltaics with outstanding performance

Xiaobing Cao<sup>1a\*</sup>, Jian Zhou<sup>1a</sup>, Gengyang Su<sup>1</sup>, Weidong Song<sup>1</sup>, Zijin Liu<sup>2</sup>, Jinquan Wei<sup>3\*</sup>

1. School of Applied Physics and Materials, Wuyi University, Jiangmen, Guangdong 529020, P.R. China

2. School of Textile Science and Engineering, Wuyi University, Jiangmen, Guangdong 529020, P.R. China.

3. State Key Lab of New Ceramic and Fine Processing, Tsinghua University, Beijing 100084, P.R. China;

\*Corresponding Authors. E-mail: [caoxb14@tsinghua.org.cn](mailto:caoxb14@tsinghua.org.cn); [jqwei@tsinghua.edu.cn](mailto:jqwei@tsinghua.edu.cn). Phone: +86-10-62781065. a: These authors contribute to this work equally

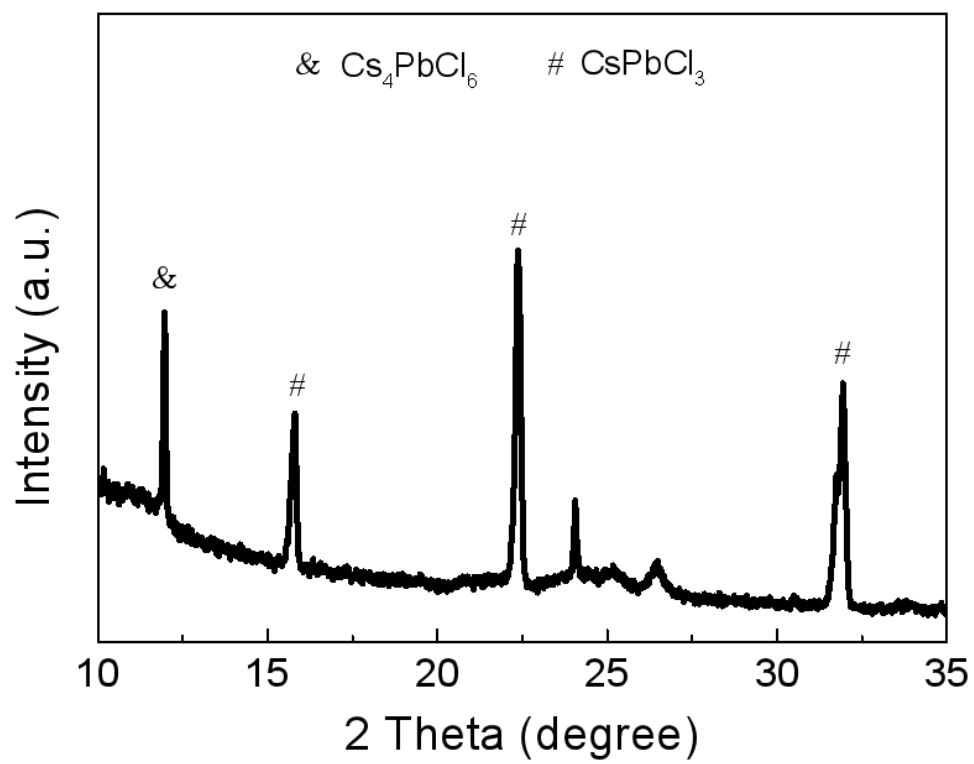

**Figure S1** XRD curve of Cs-Pb-Cl films prepared by dipping CsPbBr<sub>3</sub> films into high concentrated commercial HCl/methanol solution (~4.0 M).

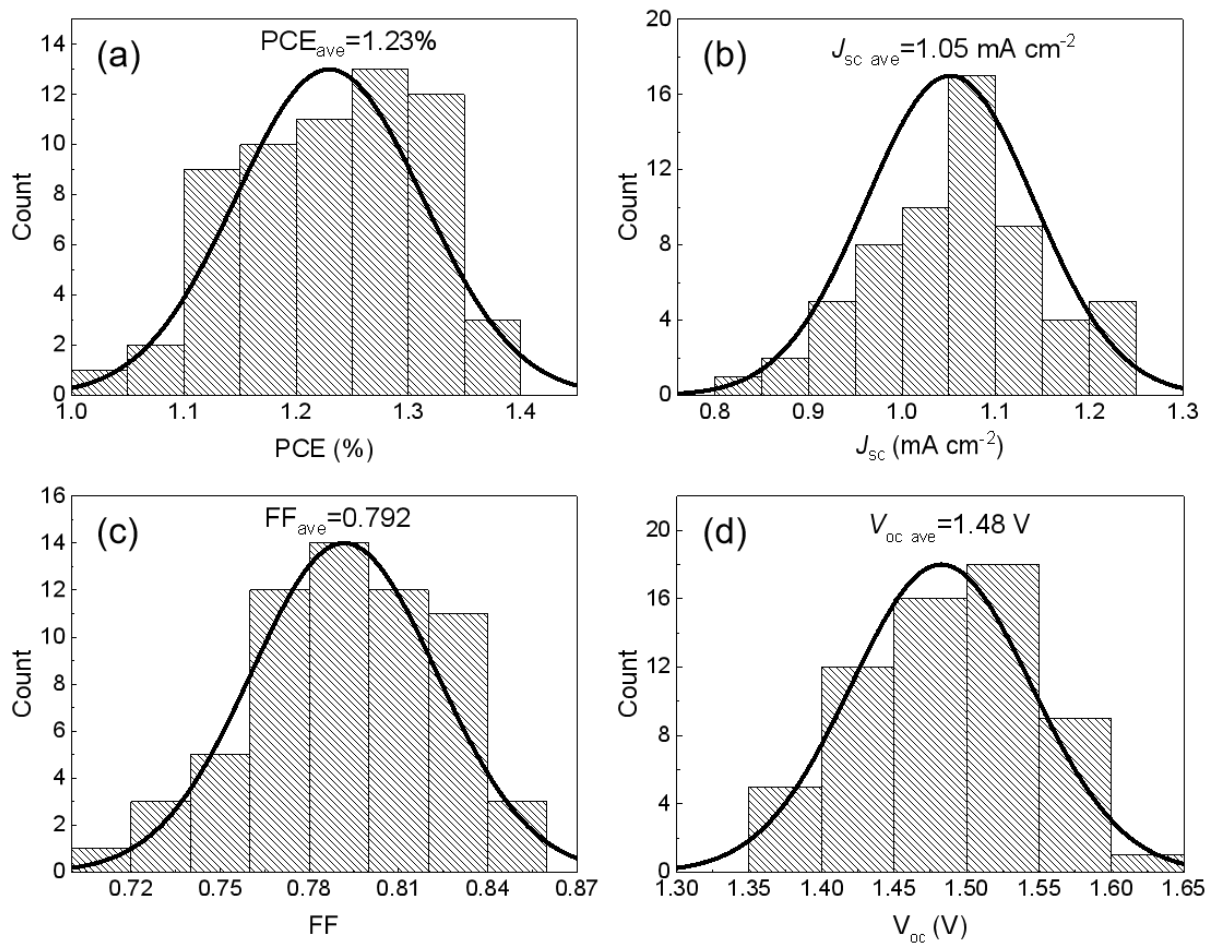

**Figure S2** The statistic results of photovoltaic parameters extracting from  $J$ - $V$  curves based on 61 PSCs. (a) PCE; (b)  $J_{sc}$ ; (c) FF; (d)  $V_{oc}$ .

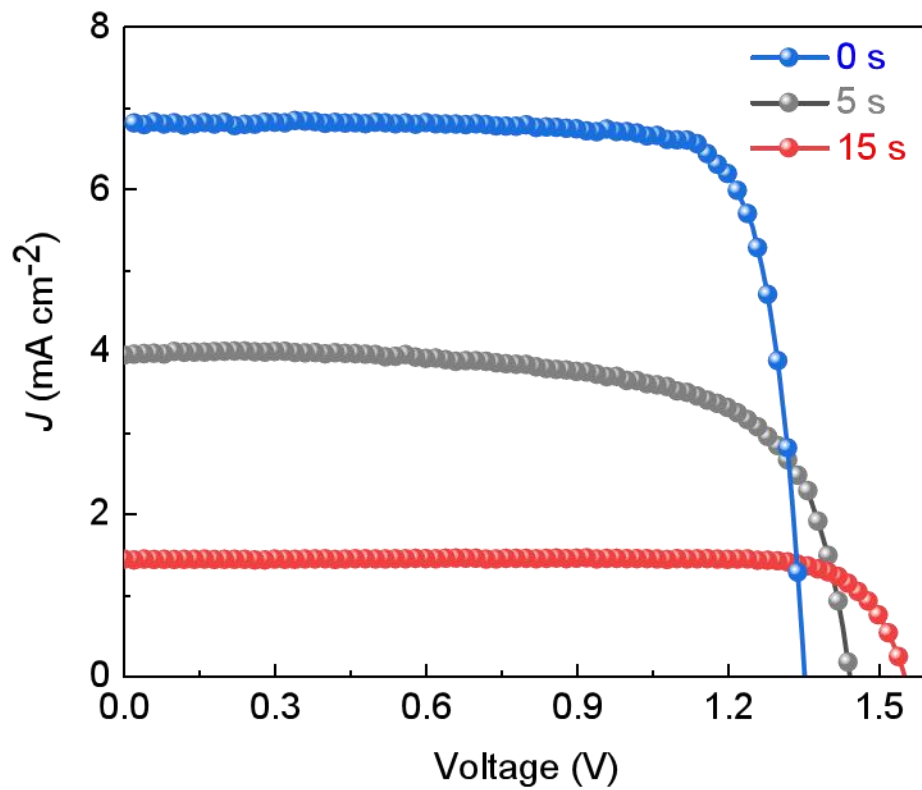

**Figure S3**  $J$ - $V$  curves the best PSCs prepared from different dipping time.

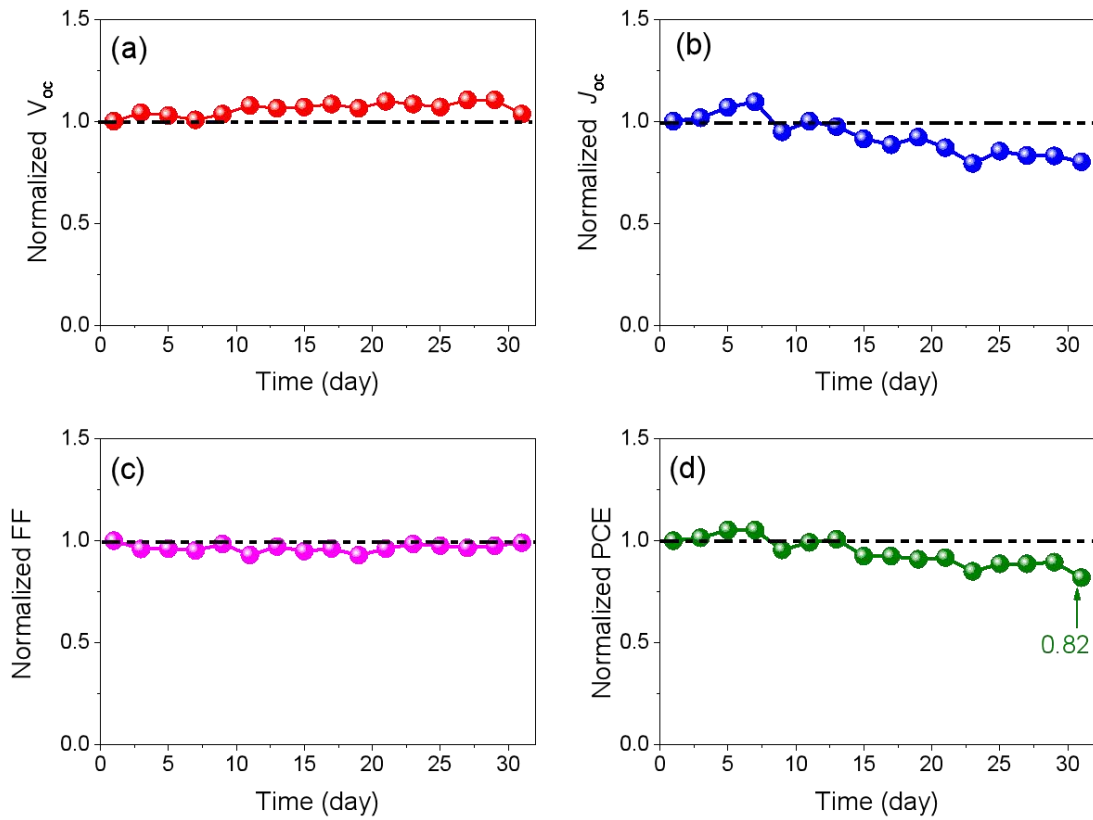

**Figure S4** The evolution of normalized photovoltaic parameters of PSC in open air. (a)  $V_{oc}$ ; (b)  $J_{sc}$ ; (c) FF; (d) PCE.

**Table S1** The comparison of the detailed parameters of solar cells using wide bandgap (~2.9 eV) perovskite films as light harvest layer.

| <b>Configuration</b>                                                             | $V_{oc}$<br>(V) | $J_{sc}$ (mA cm <sup>-2</sup> ) | <b>FF</b>    | <b>PCE</b><br>(%) | <b>Ref.</b> |
|----------------------------------------------------------------------------------|-----------------|---------------------------------|--------------|-------------------|-------------|
| FTO/c-TiO <sub>2</sub> /m-TiO <sub>2</sub> /MAPbCl <sub>3</sub> /Spiro-OMeTAD/Au | 1.78            | 0.71                            | 0.68         | 0.87              | 1           |
| FTO/c-TiO <sub>2</sub> /m-TiO <sub>2</sub> /MAPbCl <sub>3</sub> /Spiro-PT/Au     | 1.14            | 0.66                            | 0.44         | 0.33              | 2           |
| FTO/c-TiO <sub>2</sub> /m-TiO <sub>2</sub> /MAPbCl <sub>3</sub> /PTTA/Au         | 1.63            | 0.91                            | 0.68         | 1.01              | 3           |
| ITO/Cl:TiO <sub>2</sub> /MAPbCl <sub>3</sub> /Spiro-OMeTAD/Au                    | 1.65            | 0.28                            | 0.69         | 0.32              | 4           |
| FTO/c-TiO <sub>2</sub> /m-TiO <sub>2</sub> /MAPbCl <sub>3</sub> /Spiro-PT/EC     | 1.04            | 0.53                            | 0.51         | 0.28              | 5           |
| ITO/PEDOT/MAPbCl <sub>3</sub> /C <sub>60</sub> /BCP/Ag/Alq <sub>3</sub>          | 1.18            | 0.67                            | 0.41         | 0.33              | 6           |
| FTO/TiO <sub>2</sub> /CsPbCl <sub>3</sub> /Carbon                                | 1.48            | 1.13                            | 0.75         | 1.27              | 7           |
| FTO/TiO <sub>2</sub> /CsPbCl <sub>3</sub> /Carbon                                | 1.55            | 1.20                            | 0.68         | 1.26              | 8           |
| FTO/TiO <sub>2</sub> /CsPbCl <sub>3</sub> /Carbon                                | 1.53            | 1.08                            | <b>0.838</b> | <b>1.39</b>       | This work   |
| FTO/TiO <sub>2</sub> /CsPbCl <sub>3</sub> /Carbon                                | <b>1.61</b>     | 0.85                            | 0.78         | 1.01              | This work   |

## References:

- [1] W. Zia, M. Malekshahi Byranvand, T. Rudolph, M. Rai, M. Kot, C. Das, M. Kedia, M. Zohdi, W. Zuo, V. Yeddu, M. I. Saidaminov, J. I. Flege, T. Kirchartz, M. Saliba, MAPbCl<sub>3</sub> light absorber for highest voltage perovskite solar cells. *ACS Energy Lett.*, 2024, **9**, 1017.
- [2] Y. Liu, Y. Li, W. Xu, X. Chen, J. Wang, S. Yan, J. Bao, T. Qin, Preparation of micron-sized methylamine-PbCl<sub>3</sub> perovskite grains by controlling phase transition engineering for selective ultraviolet-harvesting transparent photovoltaics. *J. Colloid Interface Sci.*, 2022, **607**, 1083.
- [3] C. Li, R. Tao, Y. Ding, C. Liu, X. Ding, H. Xu, C. Zhi, C. Jia, Z. Li, Highly visible-transparent and color-neutral perovskite solar cells for self-powered smart windows. *Sol. RRL*, 2022, **6**, 2101009.
- [4] M. C. Tang, H. X. Dang, S. Lee, D. Barrit, R. Munir, K. Wang, R. Li, D. M. Smilgies, S. De Wolf, D. Y. Kim, T. D. Anthopoulos, A. Amassian, wide and tunable bandgap MAPbBr<sub>3-x</sub>Cl<sub>x</sub> hybrid perovskites with enhanced phase stability: in situ investigation and photovoltaic devices. *Sol. RRL*, 2021, **5** 2000718.
- [5] Y. Liu, J. Wang, F. Wang, Z. Cheng, Y. Fang, Q. Chang, J. Zhu, L. Wang, J. Wang, W. Huang, T. Qin, Full-frame and high-contrast smart windows from halide-exchanged perovskites. *Nat. Commun.*, 2021, **12**, 3360.
- [6] D. Liu, C. Yang, R. R. Lunt, Halide perovskites for selective ultraviolet-harvesting transparent photovoltaics. *Joule*, 2018, **2** 1827.
- [7] Z. Zhang, Y. Ba, D. Chen, J. Ma, W. Zhu, H. Xi, D. Chen, J. Zhang, C. Zhang, Y. Hao, Generic water-based spray-assisted growth for scalable high-efficiency carbon-electrode all-inorganic perovskite solar cells. *iScience* 2021, **24**, 103365.
- [8] D. Chen, Y. Ba, M. Deng, W. Zhu, W. Chai, H. Xi, D. Chen, J. Zhang, C. Zhang, Y. Hao, High-purity, thick CsPbCl<sub>3</sub> films toward selective ultraviolet-harvesting visibly transparent photovoltaics. *ACS Appl. Energy Mater.* 2021, **4**, 12121.

**Table S1** The details of the photovoltaic parameters of the PSCs prepared from different dipping time

| Dipping times | $V_{oc}$ (V) | $J_{sc}$ (mA cm <sup>-2</sup> ) | FF   | PCE (%) |
|---------------|--------------|---------------------------------|------|---------|
| 0 s           | 1.35         | 6.85                            | 0.81 | 7.48    |
| 5 s           | 1.44         | 4                               | 0.69 | 3.95    |
| 15 s          | 1.55         | 1.46                            | 0.82 | 1.86    |
